# 1 **The structural basis for activation of voltage sensor domains in an ion channel TPC1**

2 Alexander F. Kintzer<sup>†,1</sup>, Evan M. Green<sup>†,1</sup>, Pawel K. Dominik<sup>†,1,2</sup>, Michael Bridges<sup>3</sup>, Jean-Paul  
3 Armache<sup>1</sup>, Dawid Deneka<sup>2</sup>, Sangwoo S. Kim<sup>2</sup>, Wayne Hubbell<sup>3</sup>, Anthony A. Kossiakoff<sup>2</sup>, Yifan  
4 Cheng<sup>\*,1,4</sup>, Robert M. Stroud<sup>\*,1</sup>

5 <sup>1</sup>University of California, San Francisco, Department of Biochemistry and Biophysics

6 <sup>2</sup>University of Chicago, Department of Biochemistry and Molecular Biology

7 <sup>3</sup>University of California, Los Angeles, Jules Stein Eye Institute and Department of Chemistry  
8 and Biochemistry

9 <sup>4</sup>Howard Hughes Medical Institute

10 <sup>†</sup>These authors contributed equally to this work

11

12 Correspondence to Robert Stroud; [stroud@msg.ucsf.edu](mailto:stroud@msg.ucsf.edu) and Yifan Cheng; [YCheng@ucsf.edu](mailto:YCheng@ucsf.edu)

13

## 14 **Abstract**

15 Voltage sensing domains (VSDs) couple changes in transmembrane electrical potential to  
16 conformational changes that regulate ion conductance through a central channel. Positively  
17 charged amino acids inside each sensor cooperatively respond to changes in voltage. Our  
18 previous structure of a TPC1 channel captured the first example of a resting-state VSD in an  
19 intact ion channel. To generate an activated state VSD in the same channel we removed the  
20 luminal inhibitory Ca<sup>2+</sup>-binding site (Ca<sub>i</sub><sup>2+</sup>), that shifts voltage-dependent opening to more  
21 negative voltage and activation at 0 mV. Cryo-EM reveals two coexisting structures of the VSD,  
22 an intermediate state 1 that partially closes access to the cytoplasmic side, but remains occluded  
23 on the luminal side and an intermediate activated state 2 in which the cytoplasmic solvent access

24 to the gating charges closes, while luminal access partially opens. Activation can be thought of  
25 as moving a hydrophobic insulating region of the VSD from the external side, to an alternate  
26 grouping on the internal side. This effectively moves the gating charges from the inside potential  
27 to that of the outside. Activation also requires binding of  $\text{Ca}^{2+}$  to a cytoplasmic site ( $\text{Ca}_a^{2+}$ ). An  
28 X-ray structure with  $\text{Ca}_a^{2+}$  removed and a near-atomic resolution cryo-EM structure with  $\text{Ca}_i^{2+}$   
29 removed define how dramatic conformational changes in the cytoplasmic domains may  
30 communicate with the VSD during activation. Together four structures provide a basis for  
31 understanding the voltage dependent transition from resting to activated state, the tuning of VSD  
32 by thermodynamic stability, and this channel's requirement of cytoplasmic  $\text{Ca}^{2+}$ -ions for  
33 activation.

34

## 35 **Introduction**

36 Voltage sensing domains (VSDs) are four-helical bundle domains, termed S1-S4 that respond to  
37 changes in membrane potential by allowing 'gating' charges, generally positively charged  
38 arginine or occasionally lysine side chains in the fourth transmembrane helix S4 (charges  
39 referred to as R1-R5) to move relative to a charge-transfer center (CT) (1, 2) that contains  
40 counter charges in the surrounding helices S1-S3 and an aromatic residue (Y, F) that seals the  
41 VSD to solvent passage.

42 The number of gating charges in each VSD that move across the membrane from  
43 connection to the cytoplasmic side to the extracellular (or luminal) side during activation is  
44 typically measured as 2-3 and up to 5 positive charges. The basis for structural and electrical  
45 changes in S4 that give rise to voltage-dependence is key to understanding the response of  
46 voltage-gated ion channels to changes in membrane potential.

47 In voltage-gated ion channels, the movement of S4 is connected via an S4-S5 linker helix  
48 on the cytoplasmic side to the pore helices S5-S6 of the ion channel, and also through Van der  
49 Waals hydrophobic contacts between S4 and the pore-forming domains. In excitable cells,  
50 activation of the VSD in response to membrane depolarization greatly increases the probability  
51 of channel opening(3, 4).

52 Several models have been proposed for voltage-dependent activation. The ‘Sliding  
53 Helix’(5), ‘Rotating helix’(6, 7), and ‘Paddle’(8) models suggest that S4 moves substantially  
54 (vertically or in rotation) in the membrane to translate the gating charges across the membrane  
55 (Figure S1). In Sliding Helix and Rotating Helix models, the gating charges interact with counter  
56 anions or aqueous environments to avoid the energetic penalty of placing a charge in a  
57 hydrophobic environment. Lanthanide-based resonance energy transfer measurements suggest  
58 that gating charges do not move extensively during activation, but rather achieve alternating  
59 exposure to the internal and external milieu through conformational changes in the VSD helices  
60 S1-S4 (9). A ‘ratchet’ model also includes the possibility of multiple intermediate states of  
61 S4(10). Electrophysiology, electron paramagnetic resonance (EPR) spectroscopy, X-ray  
62 structures, disulfide crosslinking, and simulations support a combination of translation and  
63 rotation of S4 during activation (11–18). No structural information until now exists for voltage-  
64 gated channels captured in multiple activation states, precluding an atomic scale evaluation of  
65 the mechanism of voltage-dependent changes, or how they translate to channel activation.

66 Our previous crystal structure of wild-type *Arabidopsis thaliana* two-pore channel 1  
67 (AtTPC1<sub>WT</sub>) provided the first resting-closed state in an intact ion channel(19, 20), the  
68 electrophysiological state that forms under high luminal 1 mM (>100μM) Ca<sup>2+</sup>-ion  
69 concentration. Here we sought to determine structures for the activated-state of AtTPC1 that is

70 formed in low luminal ( $<100\mu\text{M}$ )  $\text{Ca}^{2+}$ -ions by removing the inhibitory luminal  $\text{Ca}^{2+}$ -binding  
71 site in VSD2 ( $\text{Ca}_i^{2+}$ ), while keeping the cytoplasmic activation site ( $\text{Ca}_a^{2+}$ ) occupied with  
72  $>300\mu\text{M}$  cytoplasmic  $\text{Ca}^{2+}$ -ions (21). Secondly, we wanted to determine the mechanism for the  
73 channel's requirement of cytoplasmic  $\text{Ca}^{2+}$ -ions for activation by removing the  $\text{Ca}_a^{2+}$  site.

74 TPCs are a family of ion channels that regulate ion conductance across endolysosomal  
75 membranes(21, 22, 23). Located in endosomes that endocytose from the plasma membrane,  
76 initially with  $\sim 1\text{mM}$  extracellular  $\text{Ca}^{2+}$  concentration, they regulate the conductance of  $\text{Na}^+$ -  
77 and/or  $\text{Ca}^{2+}$ -ions out of the endolysosome, intravesicular pH (24), trafficking (25), and  
78 membrane excitability (26). Cytoplasmic  $\text{Ca}^{2+}$ -ions ( $>300\mu\text{M}$ ) are required for any activation of  
79 AtTPC1 (27), whereas luminal  $\text{Ca}^{2+}$ -ions ( $>100\mu\text{M}$ ) suppress voltage-dependent activation (20,  
80 28). TPCs encode two pore-forming domains on a single chain with two non-equivalent VSDs  
81 (S1-S4, S7-S10) and pore helices (S5-S6, S11-S12). In AtTPC1 only VSD2s (S7-S10) respond to  
82 changes in voltage (20). Three arginines on S10 of each VSD2 (equivalent to S4 in the VSD of  
83 tetrameric ion channels) in AtTPC1 are required for voltage-dependent activation. A homo-dimer  
84 of two TPCs forms the central functional channel surrounded by four pore-forming domains.  
85 The dependence of AtTPC1 on external and internal  $\text{Ca}^{2+}$  offer the opportunity to visualize the  
86 resting state of a voltage sensing domain of an intact channel, and the activated state and to ask  
87 how voltage changes are detected and relayed.

88 Luminal  $\text{Ca}^{2+}$ -ions suppress activation of AtTPC1 via binding to  $\text{Ca}_i^{2+}$  located in the  
89 active voltage sensor VSD2 with  $\text{EC}_{50}\sim 0.1\text{mM}$ . This previously enabled trapping of the resting-  
90 state VSD2 of wild-type AtTPC1 by including  $1\text{mM}$   $\text{Ca}^{2+}$ -ions (19, 20). Replacement of the  
91  $\text{Ca}^{2+}$ -chelating amino acids by mutagenesis (D240N, D454N, E528Q; termed AtTPC1<sub>DDE</sub>) shifts  
92 voltage-dependent activation by  $-50\text{mV}$ , such that the channel is open at  $0\text{mV}$  (20, 28) and

93 VSD2 in an activated conformation. Using AtTPC1<sub>DDE</sub> we sought to determine the structure of  
94 an activated state of the same intact channel where we had previously determined a resting state.

95 Channel opening requires Ca<sup>2+</sup>-ion binding to Ca<sub>a</sub><sup>2+</sup> mediated by D376 of cytoplasmic EF-  
96 hand domain helix 3-4 loop (EF3-EF4). Removal of cytoplasmic Ca<sup>2+</sup>-ions or the mutation  
97 D376A (AtTPC1<sub>DA</sub>) yields permanently closed channels (29). The absolute requirement of the  
98 Ca<sub>a</sub><sup>2+</sup> site for voltage-dependent activation led us to hypothesize that channel activation depends  
99 on communication between Ca<sub>a</sub><sup>2+</sup> and VSD2 (21). Using the D376A mutation we sought to  
100 determine how cytoplasmic Ca<sup>2+</sup> evokes activation.

101

## 102 **Results and Discussion**

### 103 **Cryo-EM structures of AtTPC1<sub>DDE</sub>**

104 As a basis for understanding the voltage-dependent activation mechanism and its modulation by  
105 Ca<sup>2+</sup>-ions, we determined the structure of AtTPC1<sub>DDE</sub> by cryo-EM (Figure 1a, Figure S2, S3, S4,  
106 Table S1). We employed saposin A nanoparticles (30) to reconstitute AtTPC1<sub>DDE</sub> into a  
107 membrane environment, and an antibody Fab made against AtTPC1 (CAT06/H12) (31) to  
108 facilitate particle alignment (32) (Figures S5, S6, See Supplemental Discussion).

109 With a nominal resolution of 3.3 Å, the density map of AtTPC1<sub>DDE</sub> is of high quality  
110 (Figure S4a), allowing additional *de-novo* interpretation of the AtTPC1 N-terminal domain  
111 (NTD), the S1-S2 linker, EF3-EF4 with an intact Ca<sub>a</sub><sup>2+</sup> site, the upper vestibule of the pore, and  
112 the C-terminal domain (CTD). Three ions lie in the selectivity filter, consistent with previously  
113 defined Ca<sup>2+</sup>/Na<sup>+</sup>-binding sites (19, 20, 33). Fourteen lipid molecules surround the channel in the  
114 luminal leaflet with two on the cytoplasmic side (Figure S7). S1-S6 are well defined and remain  
115 stationary between all of the AtTPC1 structures. In AtTPC1<sub>DDE</sub>, major rearrangements are

116 observed in the VSD2, the upper vestibule of pore, and EF3-EF4 on the cytoplasmic side,  
117 relative to AtTPC1<sub>WT</sub> (Figure 1b). The position of three residues known to be phosphorylated  
118 (S22, T26, and T29) are observed in previously unresolved portions of the NTD (Figure S4a, See  
119 Supplemental Discussion) (19).

120 The Fab binds to the EF1-EF2 loop, EF4, and S6 on the cytoplasmic side. The Fab  
121 binding affinity is the same with and without Ca<sup>2+</sup> ions, in other molecular conditions tested (1  
122 mM EGTA, 1 μM trans-NED19, 1 μM Nicotinic Acid Adenine Dinucleotide Phosphate), and in  
123 three different constructs (AtTPC1<sub>WT</sub>, AtTPC1<sub>DDE</sub>, AtTPC1<sub>DA</sub>), indicating that the Fab binding  
124 does not distinguish between nor is likely to influence the activation state (Figure S5c-d). Most  
125 of the variable domain of the Fab is visible, allowing interpretation of the AtTPC1<sub>DDE</sub>-Fab  
126 interface (Figure S6e-f). The constant domain of the Fab is flexible and not resolved to high  
127 resolution.

128

### 129 **Activation of the voltage sensor**

130 Luminal Ca<sup>2+</sup>-ions inhibit AtTPC1 channel activation half maximally at ~0.1 mM  
131 concentration(20) via binding to Ca<sub>i</sub><sup>2+</sup> (21) between VSD2 (D454 in the S7-S8 loop, and E528 in  
132 S10), and the pore (D240). D454N, also named *fou2* (fatty acid oxygenation up-regulated 2)  
133 (28), abolishes inhibition by luminal Ca<sup>2+</sup>-ions, increasing channel open probability by shifting  
134 the voltage-dependent channel opening towards more hyperpolarizing potentials (28, 20). Ca<sup>2+</sup>-  
135 ions do not inhibit AtTPC1<sub>DDE</sub> at 1 mM and up to 10 mM (33). Thus, the Ca<sub>i</sub><sup>2+</sup> site is  
136 functionally abolished in AtTPC1<sub>DDE</sub> under cryo-EM conditions and thereby mimics the  
137 activated state under voltage and low luminal Ca<sup>2+</sup>-ion conditions (20, 33).

138 While the overall resolution of AtTPC1<sub>DDE</sub> is excellent, density for S7-S10 of VSD2 is  
139 significantly weaker indicating conformational heterogeneity. Focused classification identified  
140 two states of VSD2, each with an overall resolution of 3.7 Å, but with distinct and different  
141 conformations of the S7-S10 domain structure (state 1 and 2) (Table S1, Figure S3, See  
142 Methods). We therefore conclude that these two conformations represent different functional  
143 states of the AtTPC1<sub>DDE</sub> channel. They suggest a model for the voltage-activation of AtTPC1,  
144 and a mechanism for dependence on luminal Ca<sup>2+</sup>-ions.

145 To confirm that the structural rearrangements in VSD2 were not induced by saposin A we  
146 determined a ~7Å reconstruction of AtTPC1<sub>WT</sub> in both detergent and in saposin A. In these the  
147 overall channel architecture is comparable to the AtTPC1<sub>WT</sub> crystal structure (Figure S8).

148 The local resolution of VSD2 (S7-S10) ranges from 4-6 Å in both states, making it  
149 possible to model the intermediate active state of VSD2 based on the 2.8 Å X-ray structure of  
150 AtTPC1<sub>WT</sub> (Figure S4b, c, See Methods under Structure Determination and Refinement)(19).  
151 Atomic structures for states 1 and 2 were determined by real-space and B-factor refinement  
152 against the cryo-EM densities. Changes in solvent accessibility at the luminal and cytoplasmic  
153 boundaries of VSD2 were apparent from the comparison of these new structures of AtTPC1 and  
154 the previous resting-state. Taking the resting state structure of AtTPC1<sub>WT</sub> as a reference (PDBID  
155 5DDQ; ref. (19)), transmembrane helices S7-S10 in state 1 rotate in a counterclockwise manner  
156 with respect to AtTPC1<sub>WT</sub> (Figure 2). The helices twist to partially close the cytoplasmic solvent  
157 access to the gating charges of VSD2 (Figure 3), while the luminal face remains occluded.  
158 Among all helices of VSD2, the key arginine-rich S10 has the least movement, and R537 (R1)  
159 remains interacting with the CT (Y475), albeit the changes in S8 conformation place R1 on the  
160 opposite horizontal face of the CT as compared with AtTPC1<sub>WT</sub>. S8 moves upward in the

161 membrane plane by nearly one helical turn, thus moving the CT into place to interact with R1 in  
162 similar manner to AtTPC1<sub>WT</sub>. State 1 probably represents a resting-state structure present in low  
163 luminal (<0.1 mM) Ca<sup>2+</sup>-ion concentrations.

164 In state 2, VSD2 rotates ~20° clockwise in the plane of the membrane with respect to  
165 AtTPC1<sub>WT</sub> (Figure 2). Helices S7-S10 reorient dramatically leading to an opening of the luminal  
166 face of VSD2 (Figure 3). Tilting of S10 and rotation of S8 around S10 moves the CT downward,  
167 placing R1 in an activated conformation. The cytoplasmic face is fully closed in state 2 while the  
168 luminal side is partially open. VSD2 has effectively alternated solvent access, or electrical  
169 contact from the cytoplasmic to the luminal side of the membrane.

170 Clockwise rotation was proposed to connect resting- and active-state conformations on  
171 the basis of comparing previous voltage-gated channel structures (13, 19, 34). During review of  
172 this manuscript, activated state structures of mouse TPC1 were determined (35). Comparing the  
173 activated-state mouse TPC1 to resting- and intermediate-state AtTPC1 supports the proposed  
174 role of VSD2 rotation during channel activation. The observation of clockwise rotation in  
175 multiple activated-state structures supports our conclusion that state 2 represents an intermediate-  
176 activated state of AtTPC1.

177 These two states of VSD2 in AtTPC1 are likely to represent structures that VSD2 adopts  
178 in low luminal Ca<sup>2+</sup> during activation. The overall movement of VSD2 during activation serves  
179 to dilate the luminal face of VSD2, close off the cytoplasmic leaflet to solvent, and move the CT  
180 below a gating charge in the membrane. This would reconnect the positive gating charges from  
181 the potential of the cytoplasmic side to the potential of the luminal side upon activation,  
182 mediated by tilt and twisting of S7, S8, S9 around S10. This is all that is necessary to transport  
183 the gating charge arginine residues from cytoplasmic electrical connection, to the external



184 potential. A hydrophobic sealed region between all four helices forms a thin outer insulating  
185 layer in the resting state, while in the activated state this becomes open to solvent and the bundle  
186 twists to form a hydrophobic insulating region closer to the cytoplasmic side.

187

### 188 **Drug and Lipid Binding Sites**

189 The high resolution map enabled refinement of a total of 14 lipids on the luminal and 2 on the  
190 cytoplasmic leaflet of the membrane. The luminal lipids are modeled as the 16-carbon  
191 containing palmitic acid, the predominant lipid length in soy polar lipids, whereas the  
192 cytoplasmic lipids are modeled as 18-carbon phosphatidic acid (PA). 12 lipids bind to the long  
193 axis of AtTPC1, occupying the binding site for Ned19 (Figure S7, ref. (19, 21)). Ned19 binding  
194 may disrupt these structured lipids, acting as a steric block to prevent S7 and pore movements  
195 during gating. One lipid binds to a buried site along the short axis, sandwiched in between the  
196 pore domains. Based on homology to  $Ca_v$  channels in this region and recent structures of  
197 bacterial  $Ca_v$  channels ( $Ca_vAb$ ) bound to dihydropyridines (DHP) (amlodipine and nimodipine)  
198 and PPA (verapamil) inhibitors(36), the short axis in transmembrane segments S6 and S12 is a  
199 likely site for binding of Tetrandrine, a bis-benzylisoquinoline alkaloid isolated from the Chinese  
200 herb *Stephania tetrandra*(37) and approved medications of the DHP class of L-type  $Ca_v$   
201 antagonists—all TPC channel blockers.

202 The luminal PA lipids bind along the short axis in a pocket formed by S1 of VSD1, the  
203 S10-S11 linker, S11, and the S8-S9 linker of VSD2. The alkyl chains make Van der Waals  
204 interactions, whereas the phosphoglycerol headgroup makes hydrogen bonds to the backbone of  
205 W492 and to the sidechain of R498 and S8-S9 of VSD2. The S8-S9 linker moves 4Å inward in  
206 the AtTPC1<sub>DDE</sub> structure to form the PA binding site, which would not be intact in the

207 AtTPC1<sub>WT</sub> resting-state. Therefore, this lipid binding site is likely specific for AtTPC1<sub>DDE</sub>.  
208 Certain lipids may occupy this site during activation of AtTPC1. Polyunsaturated fatty acids  
209 inhibit plant TPC1 activation, but the binding site has not been determined (38). In principle,  
210 polyunsaturated fatty acids could mimic the observed site in the resting-state and prevent  
211 activation.

212

### 213 **Charge transfer mechanism**

214 State 2 represents an intermediate activation state of VSD2 where the gating charge R1 is  
215 transferred across the membrane (Figure 3). In this state, the CT moves downwards, R1 moves  
216 slightly upwards, and overall the VSD2 bundle rotates by  $\sim 20^\circ$  in the membrane plane with  
217 respect to the adjacent pore domains. In this the voltage-sensing helix S10 pivots only 2-3°  
218 inward toward the pore. Importantly, the three observed states of the VSD thus far are not related  
219 by rigid-body rotations. These changes in VSD2 make R1 more accessible to solvent on the  
220 luminal side while charges R2 and R3 are shielded from access to the cytoplasmic side; there is  
221 a net transfer of charge from cytoplasmic side (in the resting state) to the outside (in the activated  
222 state).

223

### 224 **Pore conformational changes**

225 High-resolution density for the pore defines the consequences of activation by removal of the  
226 external Ca<sub>i</sub><sup>2+</sup> site on VSD2 on the central channel (Figure 4a, b). As a consequence of the  
227 rearrangement of VSD2 the upper vestibule and the upper selectivity filter of the channel open  
228 along the ion permeation pathway (Figure 4c), while the lower gate remains closed (Figure 4d).  
229 Full channel opening may be evoked by passage of ions or an additional energy barrier, because

230 electrophysiological studies show the channel is maximally open at 0 mV with removal of the  
231  $\text{Ca}_i^{2+}$  site.

232 In the selectivity filter, three ions are observed (Figure 4e, f). Site 1 and 3 were occupied  
233 by  $\text{Ca}^{2+}$  mimetics,  $\text{Yb}^{3+}$  or  $\text{Ba}^{2+}$ , in AtTPC1<sub>WT</sub> structures (19, 20). Site 2 was seen to be occupied  
234 by  $\text{Na}^+$  in the  $\text{Na}^+$ -selective chimera of AtTPC1(33). Since AtTPC1<sub>DDE</sub> contains 1 mM  $\text{Ca}^{2+}$  and  
235 the channel is  $\text{Ca}^{2+}$ -selective, these are probably hydrated  $\text{Ca}^{2+}$ -ions (See Supplemental  
236 Discussion). Sidechain interactions from the upper vestibule of S11-S12 exclusively coordinate  
237 site 1. The side chains of D606 move inward to coordinate site 1 with E605 (Figure 4g). E605-  
238  $\text{Ca}^{2+}$  (5.5 Å) and D606- $\text{Ca}^{2+}$  (4.6 Å) distances are consistent with the radius of a hydrated  $\text{Ca}^{2+}$   
239 ion. There are readjustments throughout the channel suggesting that VSD2 activation by removal  
240 of the luminal  $\text{Ca}_i^{2+}$  site can indeed potentiate channel opening as observed by electrophysiology.

241 The observation of upper and lower selectivity filter and activation gate operating  
242 independently in our structures suggests a multi-step gating mechanism that resembles that  
243 proposed for TRPV1 channel activation (39). Activation of the VSDs could lead to opening of  
244 the selectivity filter and activation gate in two steps. First, the upper selectivity filter opens in  
245 response to rotational rearrangement and partial activation of the VSDs, then the lower  
246 selectivity filter and activation gate open when the VSD achieves maximal activation.

247

#### 248 **Cytoplasmic activation by $\text{Ca}^{2+}$ -ions**

249 Full voltage-dependent activation of AtTPC1 requires ~0.3 mM cytoplasmic  $\text{Ca}^{2+}$  evoked by  
250  $\text{Ca}^{2+}$ -binding to the EF3-EF4 loop (20, 29). D376 in EF3 is critical; when substituted D376A in  
251 AtTPC1<sub>DA</sub> the channel remains closed and is no longer responsive to membrane potential (29).  
252 We determined the crystal structure of AtTPC1<sub>DA</sub> (Figure 5a, Table S2) to 3.5 Å resolution by

253 X-ray crystallography. When compared with the AtTPC1<sub>WT</sub> crystal structure, removing the  
254 activating cytoplasmic Ca<sub>a</sub><sup>2+</sup> binding site leads to higher dynamic motion (B-factors) not only in  
255 the EF-hand and the CTD, but also in the VSDs and upper vestibule of the pore, showing that the  
256 activating cytoplasmic site may act through effects on the VSDs (See Supplemental Discussion).

257 AtTPC1<sub>DA</sub> is in a resting-state as expected. However, there is an overall effect of  
258 increasing the dynamical motion of VSD1, VSD2 and the pore (in the context of otherwise  
259 identical overall B-factors), showing that Ca<sub>a</sub><sup>2+</sup> has an allosteric effect in stabilization that could  
260 impact voltage dependence (VSDs) and conductance (the pore). The regions of increased motion  
261 in AtTPC1<sub>DA</sub> correspond to the regions that undergo conformational change in AtTPC1<sub>DDE</sub>,  
262 suggesting that there is a pathway for coupling cytoplasmic activation at Ca<sub>a</sub><sup>2+</sup> to voltage  
263 dependence of activation in VSD2 and transmission to the pore.

264 The Ca<sub>a</sub><sup>2+</sup> site in EF3 is fully formed in the cryo-EM structure of AtTPC1<sub>DDE</sub>, whereas it  
265 was partially occupied in AtTPC1<sub>WT</sub> and was in a more extended conformation(19, 20) (Figure  
266 5b). In AtTPC1<sub>DDE</sub>, EF3 alone lies 7 Å closer to the transmembrane domain and rotates 20° to  
267 make close contacts with EF4 (Figure 5c). The Ca<sub>a</sub><sup>2+</sup> chelating residues E374, D376, and D380  
268 order the EF3-EF4 loop around the activating Ca<sub>a</sub><sup>2+</sup> site (Figure 5c). Movement of EF3 leaves the  
269 EF1-EF2 Ca<sub>a</sub><sup>2+</sup> site unaltered. Therefore, EF3 is capable of undergoing large-scale movements  
270 that change the structure of the cytoplasmic domains and their connection to VSD2, suggesting  
271 that activation on the cytoplasmic side can act reciprocally through VSD2.

272 The conformation of the cytoplasmic domains seen in AtTPC1<sub>DDE</sub>, probably reflects the  
273 predominant structure in AtTPC1<sub>WT</sub> (rather than the crystal structure) because the conformation  
274 of EF3 is conserved in cryo-EM structures from several conditions; detergent and saposin A

275 nanoparticles of AtTPC1<sub>WT</sub>, and AtTPC1<sub>DDE</sub>, and when bound to either of two different Fab  
276 molecules (Figure S8c).

277         The CTD of AtTPC1 is indispensable for channel activation(40). Removal or truncation  
278 by 29 residues abolishes channel function. In the crystal structure of AtTPC1<sub>WT</sub>, the CTD forms  
279 an intramolecular complex with the EF3 via salt-bridge interaction D376-R700, leading to the  
280 hypothesis that the EF3-CTD complex could undergo conformational changes upon activating  
281 cytoplasmic Ca<sup>2+</sup>-binding (19). In the cryo-EM structures the CTD moves toward the membrane  
282 vertically by 13Å to accommodate the upward movement of EF3 upon forming the cytoplasmic  
283 activating Ca<sub>a</sub><sup>2+</sup> site (Figure 5b). The salt-bridge (D376-R700) that previously linked the CTD to  
284 EF3 in AtTPC1<sub>WT</sub> breaks to allow D376 to chelate the Ca<sub>a</sub><sup>2+</sup> site. This can explain why only  
285 substitution of D376 and not the other chelating residues abolishes Ca<sup>2+</sup>-activation(29). In  
286 AtTPC1<sub>DDE</sub>, the CTD now forms a hydrogen bond (E366-E694) with EF3 and hydrogen bonds  
287 (N697-I371) via the backbone (Figure 5d). Following the interaction with EF3, and a β-turn the  
288 CTD to folds back on itself to form a charged zippered interaction (R696-D691, R700-Q688,  
289 R707-E684) between the signal poly-R and poly-E motifs of the CTD (19). The poly-E motif  
290 connects directly to the pore gate (Figure 5e). The role of the CTD on channel activation may be  
291 to stabilize the EF3 helix in both apo- and Ca<sup>2+</sup>-bound conformations to allow communication of  
292 EF3 movement to VSD2 and the pore gate. Upon removal of Ca<sup>2+</sup>, the CTD could adopt an  
293 extended conformation to reform the salt-bridge interaction D376-R700 with EF3. Without the  
294 CTD, EF3 may not be able to reform the Ca<sub>a</sub><sup>2+</sup> site and would become trapped in an inactive  
295 state.

296         To further investigate the conformation of EF3 in solution, we performed continuous  
297 wave electron paramagnetic resonance (CW-EPR) experiments using spin-labeled full-length

298 AtTPC1 lacking cysteines (AtTPC1<sub>cysless</sub>; See Methods) in detergent micelles. Ten positions in  
299 the CTD, gate, and EF-hand domains were examined by spin-probe mobility and responsiveness  
300 to Ca<sup>2+</sup>-ions. Labeling at a site on EF3 (R379) indicates a conformational shift to higher probe  
301 mobility as compared with EGTA, indicating that the probe changes environment in the presence  
302 of Ca<sup>2+</sup>-ions (Figure S9). Mutation of the Ca<sub>a</sub><sup>2+</sup> site but not the Ca<sup>2+</sup>-site in EF1-EF2 abolishes  
303 the Ca<sup>2+</sup>-dependent increase in probe mobility, suggesting that EF3/Ca<sub>a</sub><sup>2+</sup> changes conformation  
304 upon increasing cytoplasmic Ca<sup>2+</sup>-ion concentrations. The data suggest that the AtTPC1<sub>WT</sub>  
305 crystal structure likely represents an apo-state of EF3, whereas AtTPC1<sub>DDE</sub> represents a Ca<sup>2+</sup>-  
306 bound conformation present along the pathway of activation.

307

### 308 **Alternate Access Mechanism of Activation**

309 As the electric potential changes across a membrane, functional voltage sensors find a new free  
310 energy minimum. Under hyperpolarizing conditions, the favorable electrostatic free energy  
311 component of positive gating charges' attraction to internal negative potential is balanced against  
312 a structural 'distortion' free energy cost. Depolarization therefore releases both of these  
313 components to populate a new overall equilibrium state that includes a component that regulates  
314 the open probability of the pore. Release of the electrostatic free energy is achieved by  
315 alternating access of the positively charged gating charges on S10 to solvent from the  
316 cytoplasmic side in the hyperpolarized resting state, to a state in which they are insulated from  
317 the cytoplasmic side, and become accessible to solvent from the luminal side, without any  
318 necessity for vertical movement of the gating charges themselves. The structures of AtTPC1<sub>WT</sub>  
319 and AtTPC1<sub>DDE</sub> suggest that this 'alternating access' mechanism plays the key role. The

320 movement of the VSD2 helices S7, S8, S9 with respect to the gating charges on S10 achieve this  
321 (Figure 6).

322 Hence the potential gradient is focused across a thin hydrophobic region close to the  
323 luminal (external) side in the resting-state, and alternately across one on the cytoplasmic side in  
324 the activated-state. Thus, the gating charges do not require any vertical movement across the  
325 bilayer as the electrically insulating region, which includes the CT and across which the voltage  
326 gradient is formed, moves from outside of the gating charges in the resting-state voltage sensor,  
327 to the cytoplasmic side of gating charges in the activated-state. Thus, the electric component of  
328 free energy is released.

329 The mechanism is unique versus most previously proposed models in that S7-S9, not  
330 only S10 that is closest to the pore, are crucial during voltage-activation to move gating charges  
331 from the electric potential on one side of the membrane to the potential of the other side without  
332 any necessary vertical translation of S10. Even after this major driving effect, gating charge side  
333 chains will also readjust in context of their different environments and some vertical movement  
334 may find more favorable energetics in the shallow energy gradient around them.

335 There is a teleologically favorable aspect to this alternate access mechanism in that it  
336 does not need to remove any hydrophobic residues out of the bilayer as would be required of a  
337 model involving large vertical movement of S10. It also does not need to rebuild the  
338 hydrophobic interface between S10 of the VSD and the walls of the pore with which it forms the  
339 primary contact that may be important in changes that alter open probability of the channel.  
340 Simulations of VSDs that assume a linear gradient of electric potential across the bilayer that  
341 changes only in slope on depolarization, but not position of start and end points across the VSD  
342 may not represent the true physiological state.

343           The Gibbs free energy change on moving one charge across a transmembrane potential  
344 difference of -70 mV is -1.6 kcal/mole. The measured gating charge transfer for activation of  
345 AtTPC1 is 3.9 charges(20) or -6.3 kcal/mole in free energy difference.  $\text{Ca}^{2+}$  that effectively  
346 stabilizes the resting-state. The  $\text{EC}_{50}$  for the  $\text{Ca}_i^{2+}$  site is  $\sim 0.1$  mM. Therefore, assuming a  $K_d \sim 0.1$   
347 mM, the free energy released by removing each  $\text{Ca}_i^{2+}$  site is  $\sim 5.6$  kcal/mole per site (or  $\sim 11.2$   
348 kcal/mole per AtTPC1 channel). It is not unreasonable that this difference, in releasing the  
349 restraint at  $\text{Ca}_i^{2+}$ , could allow the VSD to reach its active state that would normally be evoked by  
350 depolarizing the transmembrane potential at low  $\text{Ca}^{2+}$ . The fact that we observe intermediate  
351 states of TPC1 upon removing  $\text{Ca}_i^{2+}$  rather than the fully activated state suggests that the  
352 membrane voltage may contribute additional energy to maximize activation of VSD2 and  
353 channel open probability.

354           The mechanism suggested for AtTPC1 voltage dependent activation is the first time that  
355 atomic structures have been determined for intermediates on transition from resting-state to  
356 activated-state in an intact voltage-dependent channel. The structures also capture large-scale  
357 rotation of VSDs that could play a role in activation. It could be a general way in which gating  
358 charge can move energetically downhill in response to a change in voltage, without the energetic  
359 cost of removing any hydrophobic lipophilic regions out of the membrane.

360  
361 **Acknowledgements.** We thank J. Finer-Moore for aiding with manual building, refinement, and  
362 critical reading of the manuscript. We thank A. Brilot, K. Verba, E. Palovcak, and D. Asarnow  
363 for help with data processing and refinement, R. Wang for help using Rosetta, D. Bulkley and M.  
364 Braunfeld at UCSF, and Z. Yu and his colleagues at the HHMI Janelia Cryo-EM Facility for  
365 aiding with data collection, and Ali Punjani for a pre-release version of cryoSPARC v2. This



366 work was supported by NIH grant GM24485 (to R.M.S), Postdoctoral Independent Research  
367 Grant (to A.F.K) from the University of California, San Francisco Program for Breakthrough  
368 Biomedical Research, which is partially funded by the Sandler Foundation, NIH grants  
369 R01GM098672, S10OD020054, and S10OD021741 (to Y.C.), NIH grants GM117372 and  
370 GM087519 (to A.A.K), and NIH grants R01EY05216 and P30EY00331, and the Jules Stein  
371 Professor Endowment, and the Bruce Ford and Anne Smith Bundy Foundation (to W.H.). E.M.G  
372 was supported by the National Science Foundation Graduate Research Fellowship NSF 1144247.  
373 Beamline 8.3.1 at the Advanced Light Source is operated by the University of California Office  
374 of the President, Multicampus Research Programs and Initiatives grant MR-15-328599. The  
375 Berkeley Center for Structural Biology is supported in part by NIH, NIGMS, and HHMI. The  
376 Advanced Light Source is supported Contract No. DE-AC02-05CH11231. Stanford Synchrotron  
377 Radiation Lightsource Contract No. DE-AC02-76SF00515. The SSRL Structural Molecular  
378 Biology Program is supported by the DOE, and P41GM103393. Chimera was supported by  
379 NIGMS P41-GM103311.

380 **Author Contributions.** A.F.K. conceived and designed the project with assistance of R.M.S.  
381 A.F.K. and P.K.D. purified TPC1. A.F.K. performed crystallization and structure determination  
382 experiments, refined crystal and cryo-EM structures, and optimized saposin A reconstitution;  
383 E.M.G. collected and processed cryo-EM data with J-P.A. and Y.C.; P.K.D. reconstituted TPC1  
384 into nanodiscs and generated Fabs with D.D., S.S.K., and A.A.K.; M.B. collected EPR data with  
385 W.H.; A.F.K., E.M.G., Y.C., and R.M.S. wrote the manuscript. All authors contributed to  
386 manuscript preparation.

### 387 **References**

388 1. Hille B (2001) *Ion Channels of Excitable Membranes, Third Edition* (Sinauer Associates,  
389 Sunderland, Mass). 3rd Edition edition.

- 390 2. Tao X, Lee A, Limapichat W, Dougherty DA, MacKinnon R (2010) A Gating Charge Transfer  
391 Center in Voltage Sensors. *Science* 328(5974):67–73.
- 392 3. Aggarwal SK, MacKinnon R (1996) Contribution of the S4 Segment to Gating Charge in the  
393 Shaker K<sup>+</sup> Channel. *Neuron* 16(6):1169–1177.
- 394 4. Seoh S-A, Sigg D, Papazian DM, Bezanilla F (1996) Voltage-Sensing Residues in the S2 and S4  
395 Segments of the Shaker K<sup>+</sup> Channel. *Neuron* 16(6):1159–1167.
- 396 5. Catterall WA (1986) Molecular Properties of Voltage-Sensitive Sodium Channels. *Annu Rev*  
397 *Biochem* 55(1):953–985.
- 398 6. Guy HR, Seetharamulu P (1986) Molecular model of the action potential sodium channel.  
399 *Proc Natl Acad Sci U S A* 83(2):508–512.
- 400 7. Gandhi CS, Isacoff EY (2002) Molecular Models of Voltage Sensing. *J Gen Physiol*  
401 120(4):455–463.
- 402 8. Jiang Y, Ruta V, Chen J, Lee A, MacKinnon R (2003) The principle of gating charge movement  
403 in a voltage-dependent K<sup>+</sup> channel. *Nature* 423(6935):42–48.
- 404 9. Bezanilla F (2000) The Voltage Sensor in Voltage-Dependent Ion Channels. *Physiol Rev*  
405 80(2):555–592.
- 406 10. Bezanilla F, Perozo E, Stefani E (1994) Gating of Shaker K<sup>+</sup> channels: II. The components of  
407 gating currents and a model of channel activation. *Biophys J* 66(4):1011–1021.
- 408 11. Lu Z, Klem AM, Ramu Y (2002) Coupling between Voltage Sensors and Activation Gate in  
409 Voltage-gated K<sup>+</sup> Channels. *J Gen Physiol* 120(5):663–676.
- 410 12. Perozo E, Cortes DM, Cuello LG (1998) Three-dimensional architecture and gating  
411 mechanism of a K<sup>+</sup> channel studied by EPR spectroscopy. *Nat Struct Mol Biol* 5(6):459–  
412 469.
- 413 13. Payandeh J, Scheuer T, Zheng N, Catterall WA (2011) The crystal structure of a voltage-  
414 gated sodium channel. *Nature* 475(7356):353–358.
- 415 14. Li Q, et al. (2014) Structural mechanism of voltage-dependent gating in an isolated voltage-  
416 sensing domain. *Nat Struct Mol Biol* 21(3):244–252.
- 417 15. Zhang X, et al. (2012) Crystal structure of an orthologue of the NaChBac voltage-gated  
418 sodium channel. *Nature* 486(7401):130–134.
- 419 16. Long SB, Campbell EB, Mackinnon R (2005) Crystal structure of a mammalian voltage-  
420 dependent Shaker family K<sup>+</sup> channel. *Science* 309(5736):897–903.

- 421 17. Yarov-Yarovoy V, Baker D, Catterall WA (2006) Voltage sensor conformations in the open  
422 and closed states in rosetta structural models of K<sup>+</sup> channels. *Proc Natl Acad Sci*  
423 103(19):7292–7297.
- 424 18. Yarov-Yarovoy V, et al. (2012) Structural basis for gating charge movement in the voltage  
425 sensor of a sodium channel. *Proc Natl Acad Sci* 109(2):E93–E102.
- 426 19. Kintzer AF, Stroud RM (2016) Structure, inhibition and regulation of two-pore channel TPC1  
427 from *Arabidopsis thaliana*. *Nature* 531(7593):258–264.
- 428 20. Guo J, et al. (2016) Structure of the voltage-gated two-pore channel TPC1 from *Arabidopsis*  
429 *thaliana*. *Nature* 531(7593):196–201.
- 430 21. Kintzer AF, Stroud RM (2018) On the structure and mechanism of two-pore channels. *FEBS J*  
431 285(2):233–243.
- 432 22. Hedrich R, Marten I (2011) TPC1 – SV Channels Gain Shape. *Mol Plant* 4(3):428–441.
- 433 23. Patel S (2015) Function and dysfunction of two-pore channels. *Sci Signal* 8(384):re7–re7.
- 434 24. Wang X, et al. (2012) TPC proteins are phosphoinositide- activated sodium-selective ion  
435 channels in endosomes and lysosomes. *Cell* 151(2):372–383.
- 436 25. Sakurai Y, et al. (2015) Two-pore channels control Ebola virus host cell entry and are drug  
437 targets for disease treatment. *Science* 347(6225):995–998.
- 438 26. Cang C, Bekele B, Ren D (2014) The voltage-gated sodium channel TPC1 confers  
439 endolysosomal excitability. *Nat Chem Biol* 10(6):463–469.
- 440 27. Hedrich R, Neher E (1987) Cytoplasmic calcium regulates voltage-dependent ion channels in  
441 plant vacuoles. *Nature* 329(6142):833–836.
- 442 28. Beyhl D, et al. (2009) The fou2 mutation in the major vacuolar cation channel TPC1 confers  
443 tolerance to inhibitory luminal calcium. *Plant J* 58(5):715–723.
- 444 29. Schulze C, Sticht H, Meyerhoff P, Dietrich P (2011) Differential contribution of EF-hands to  
445 the Ca<sup>2+</sup>-dependent activation in the plant two-pore channel TPC1. *Plant J* 68(3):424–432.
- 446 30. Frauenfeld J, et al. (2016) A saposin-lipoprotein nanoparticle system for membrane  
447 proteins. *Nat Methods* 13(4):345–351.
- 448 31. Dominik PK, et al. (2016) Conformational Chaperones for Structural Studies of Membrane  
449 Proteins Using Antibody Phage Display with Nanodiscs. *Structure* 24(2):300–309.
- 450 32. Wu S, et al. (2012) Fabs enable single particle cryoEM studies of small proteins. *Struct Lond*  
451 *Engl* 1993 20(4):582–592.

- 452 33. Guo J, Zeng W, Jiang Y (2017) Tuning the ion selectivity of two-pore channels. *Proc Natl*  
453 *Acad Sci* 114(5):1009–1014.
- 454 34. Catterall WA, Wisedchaisri G, Zheng N (2017) The Chemical Basis for Electrical Signaling.  
455 *Nat Chem Biol* 13(5):455–463.
- 456 35. She J, et al. (2018) Structural insights into the voltage and phospholipid activation of the  
457 mammalian TPC1 channel. *Nature* 556(7699):130–134.
- 458 36. Tang L, et al. (2016) Structural basis for inhibition of a voltage-gated Ca<sup>2+</sup> channel by Ca<sup>2+</sup>  
459 antagonist drugs. *Nature* 537(7618):117–121.
- 460 37. Zhang L, et al. (2009) Ionic liquid-based ultrasound-assisted extraction of fangchinoline and  
461 tetrandrine from *Stephaniae tetrandrae*. *J Sep Sci* 32(20):3550–3554.
- 462 38. Gutla PVK, Boccaccio A, De Angeli A, Gambale F, Carpaneto A (2012) Modulation of plant  
463 TPC channels by polyunsaturated fatty acids. *J Exp Bot* 63(17):6187–6197.
- 464 39. Cao E, Liao M, Cheng Y, Julius D (2013) TRPV1 structures in distinct conformations reveal  
465 activation mechanisms. *Nature* 504(7478):113–118.
- 466 40. Larisch N, et al. (2016) The function of the two-pore channel TPC1 depends on dimerization  
467 of its carboxy-terminal helix. *Cell Mol Life Sci* 73(13):2565–2581.
- 468 41. Alvarez FJD, Orelle C, Davidson AL (2010) Functional Reconstitution of an ABC Transporter  
469 in Nanodiscs for Use in Electron Paramagnetic Resonance Spectroscopy. *J Am Chem Soc*  
470 132(28):9513–9515.
- 471 42. Borowska MT, Dominik PK, Anghel SA, Kossiakoff AA, Keenan RJ (2015) A YidC-like Protein in  
472 the Archaeal Plasma Membrane. *Struct Lond Engl* 1993 23(9):1715–1724.
- 473 43. Bailey LJ, et al. (2017) Locking the Elbow: Improved Antibody Fab Fragments as Chaperones  
474 for Structure Determination. *J Mol Biol.* doi:10.1016/j.jmb.2017.12.012.
- 475 44. Kabat EA, Wu TT, Foeller C, Perry HM, Gottesman KS (1992) *Sequences of Proteins of*  
476 *Immunological Interest* (DIANE Publishing).
- 477 45. Ritchie TK, et al. (2009) Chapter Eleven - Reconstitution of Membrane Proteins in  
478 Phospholipid Bilayer Nanodiscs. *Methods in Enzymology, Liposomes, Part F.*, ed Düzgünes  
479 N (Academic Press), pp 211–231.
- 480 46. Kawate T, Gouaux E (2006) Fluorescence-detection size-exclusion chromatography for  
481 precrystallization screening of integral membrane proteins. *Struct Lond Engl* 1993  
482 14(4):673–681.

- 483 47. Miller KR, et al. (2012) T Cell Receptor-Like Recognition of Tumor In Vivo by Synthetic  
484 Antibody Fragment. *PLOS ONE* 7(8):e43746.
- 485 48. Dominik PK, Kossiakoff AA (2015) Phage display selections for affinity reagents to  
486 membrane proteins in nanodiscs. *Methods Enzymol* 557:219–245.
- 487 49. Fellouse FA, et al. (2007) High-throughput generation of synthetic antibodies from highly  
488 functional minimalist phage-displayed libraries. *J Mol Biol* 373(4):924–940.
- 489 50. Zhang K (2016) Gctf: Real-time CTF determination and correction. *J Struct Biol* 193(1):1–12.
- 490 51. Scheres SHW (2012) RELION: implementation of a Bayesian approach to cryo-EM structure  
491 determination. *J Struct Biol* 180(3):519–530.
- 492 52. Zheng SQ, et al. (2017) MotionCor2: anisotropic correction of beam-induced motion for  
493 improved cryo-electron microscopy. *Nat Methods* 14(4):331.
- 494 53. Punjani A, Rubinstein JL, Fleet DJ, Brubaker MA (2017) cryoSPARC: algorithms for rapid  
495 unsupervised cryo-EM structure determination. *Nat Methods* 14(3):290–296.
- 496 54. Wang RY-R, et al. (2016) Automated structure refinement of macromolecular assemblies  
497 from cryo-EM maps using Rosetta. *eLife* 5:e17219.
- 498 55. Emsley P, Cowtan K (2004) Coot: model-building tools for molecular graphics. *Acta*  
499 *Crystallogr D Biol Crystallogr* 60(Pt 12 Pt 1):2126–2132.
- 500 56. Adams PD, et al. (2010) PHENIX<sup>2</sup>: a comprehensive Python-based system for  
501 macromolecular structure solution. *Acta Crystallogr D Biol Crystallogr* 66(2):213–221.
- 502 57. Pettersen EF, et al. (2004) UCSF Chimera—a visualization system for exploratory research  
503 and analysis. *J Comput Chem* 25(13):1605–1612.
- 504 58. Davis IW, Murray LW, Richardson JS, Richardson DC (2004) MOLPROBITY: structure  
505 validation and all-atom contact analysis for nucleic acids and their complexes. *Nucleic*  
506 *Acids Res* 32(Web Server issue):W615–619.
- 507 59. Barad BA, et al. (2015) EMRinger: side chain-directed model and map validation for 3D cryo-  
508 electron microscopy. *Nat Methods* 12(10):943–946.
- 509 60. Gourdon P, et al. (2011) HiLiDe—Systematic Approach to Membrane Protein Crystallization  
510 in Lipid and Detergent. *Cryst Growth Des* 11(6):2098–2106.
- 511 61. Winn MD, et al. (2011) Overview of the CCP4 suite and current developments. *Acta*  
512 *Crystallogr D Biol Crystallogr* 67(4):235–242.

- 513 62. Strong M, et al. (2006) Toward the structural genomics of complexes: Crystal structure of a  
514 PE/PPE protein complex from *Mycobacterium tuberculosis*. *Proc Natl Acad Sci*  
515 103(21):8060–8065.
- 516 63. Kabsch W (1993) Automatic processing of rotation diffraction data from crystals of initially  
517 unknown symmetry and cell constants. *J Appl Crystallogr* 26(6):795–800.
- 518 64. McCoy AJ, et al. (2007) Phaser crystallographic software. *J Appl Crystallogr* 40(4):658–674.  
519  
520

521 **Figures**

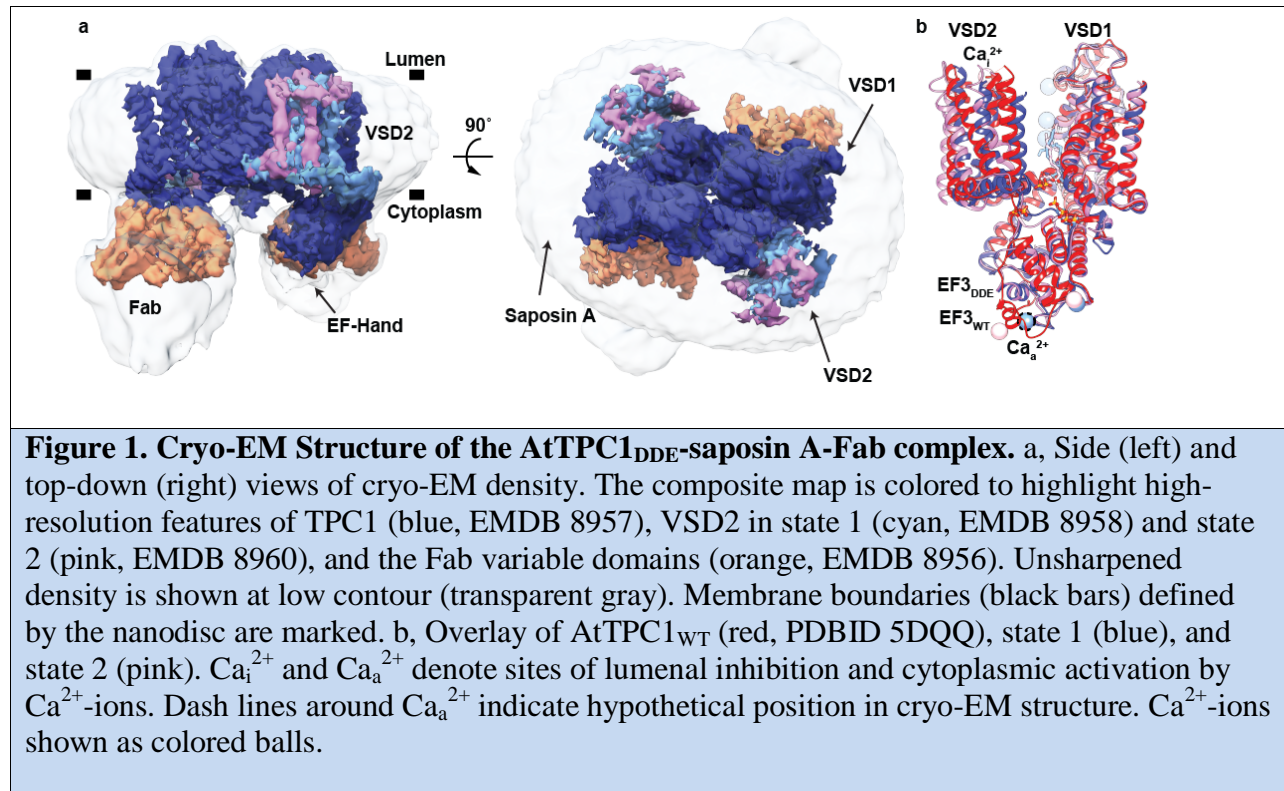

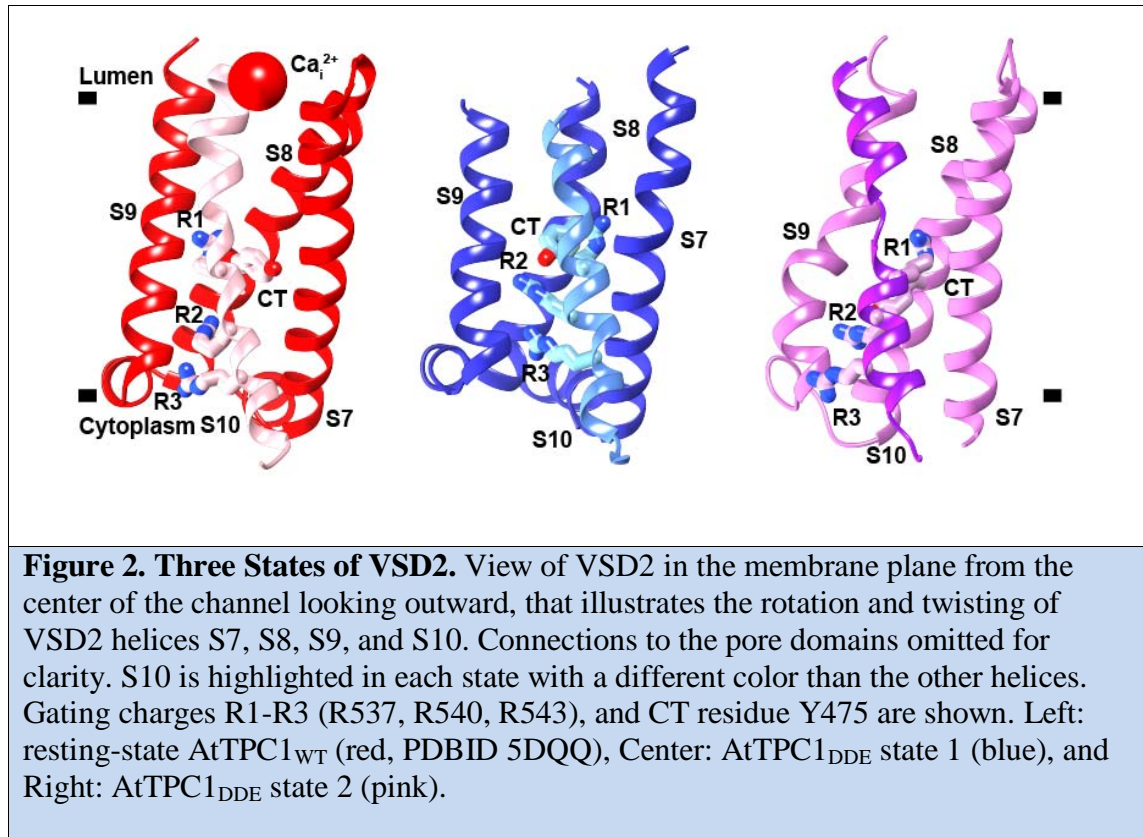

522



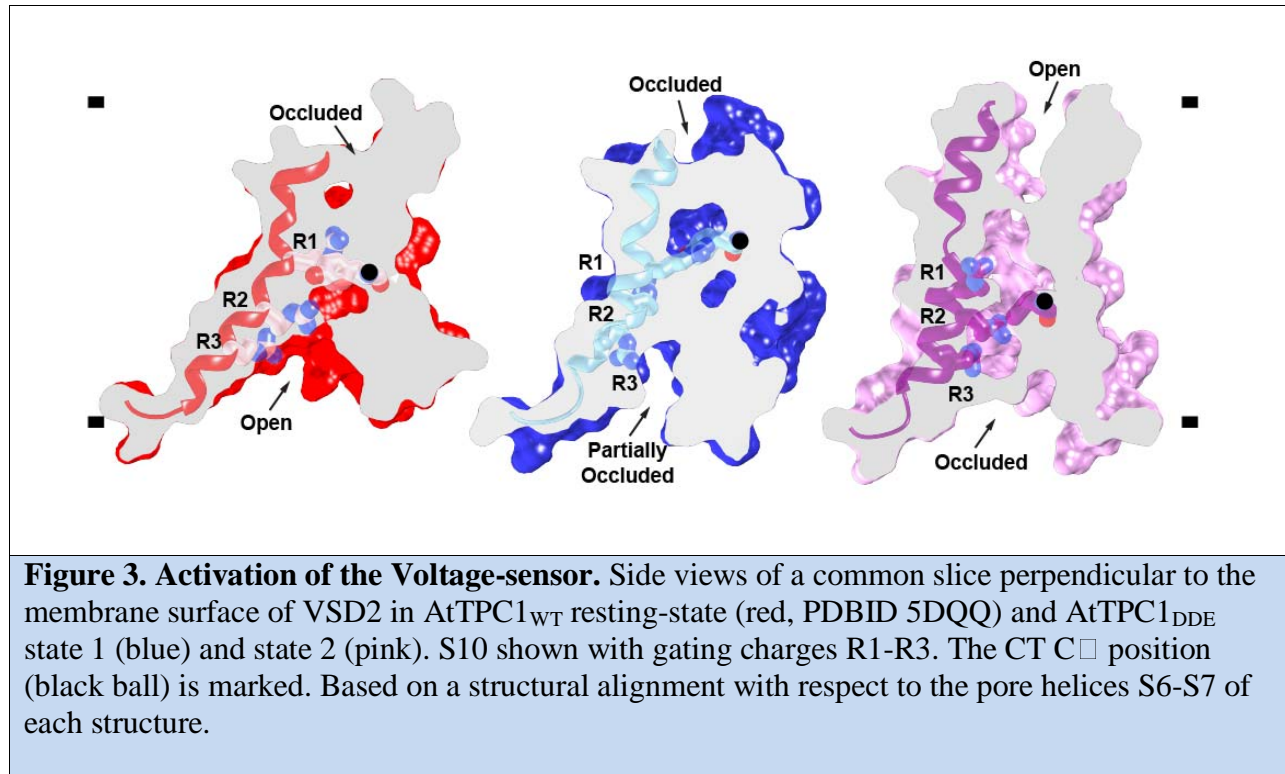

523  
524

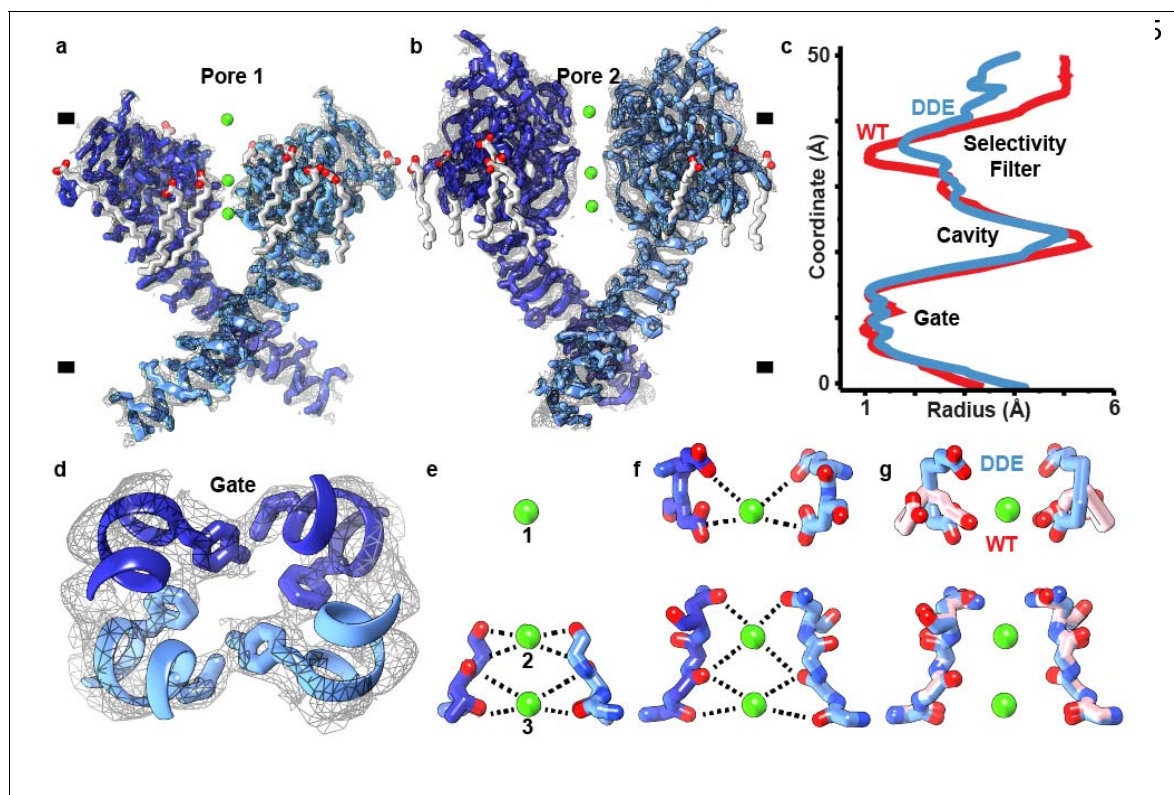

**Figure 4. Ion Permeation Pathway.** a, b, Orthogonal side views through pore helices (a) S5-S6 (pore 1) and (b) S11-S12 (pore 2) of the channel homo-dimer overlaid with high-resolution cryo-EM density (gray mesh). c, HOLE plot of pore radii along central channel coordinate of AtTPC1<sub>DDE</sub> (red) and AtTPC1<sub>WT</sub> (blue). d, Top down view through central pore. Gate residues Y305, L673, and F676 are shown. e-g, Side views through the selectivity filter in (e) pore 1, (f) pore 2, and (g) an overlay of pore 2 of AtTPC1<sub>DDE</sub> (blue) and AtTPC1<sub>WT</sub> (pink). Upper E605, D606 and lower S265, T263, T264, V628, M629, N631 selectivity filter residues are shown. Density for lipids (See Figure S7) and ions omitted for clarity.

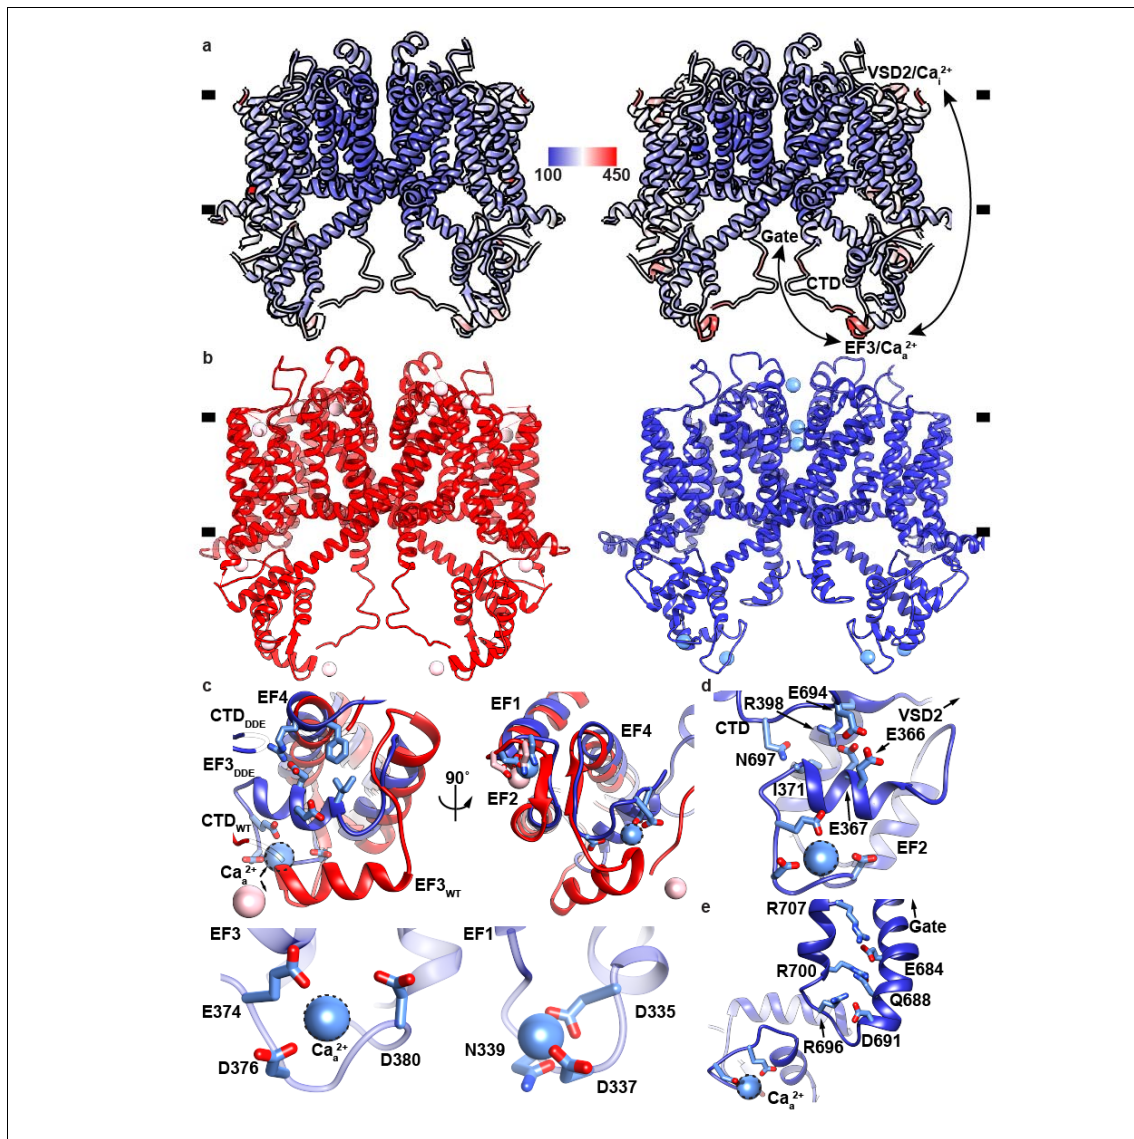

**Figure 5. Dynamics of Cytoplasmic Domains.** a, Overlay of (left) AtTPC1<sub>WT</sub> and (right) AtTPC1<sub>DA</sub> crystal structures colored by B-factor value (100-450 Å<sup>2</sup>) (See Methods and Supplemental Discussion). b, Sideviews of AtTPC1<sub>WT</sub> (red) and AtTPC1<sub>DDE</sub> (blue). c, Views from (top left) side and (top right) bottom of EF3 for overlaid AtTPC1<sub>DDE</sub> (blue) and AtTPC1<sub>WT</sub> crystal structures (red, PDBID 5DQQ). CTD interactions omitted for clarity. Bottom panels show Ca<sup>2+</sup>-ion binding sites in (bottom right) EF1-EF2 and (bottom left) EF3-EF4. d, View of EF3-CTD and EF3-EF4 interactions and connection to VSD2. e, Structure of the CTD in AtTPC1<sub>DDE</sub> and a possible coupling pathway to the pore gate and Ca<sub>a</sub><sup>2+</sup>. Dash lines indicate the hypothetical Ca<sub>a</sub><sup>2+</sup> ion position.

526

527

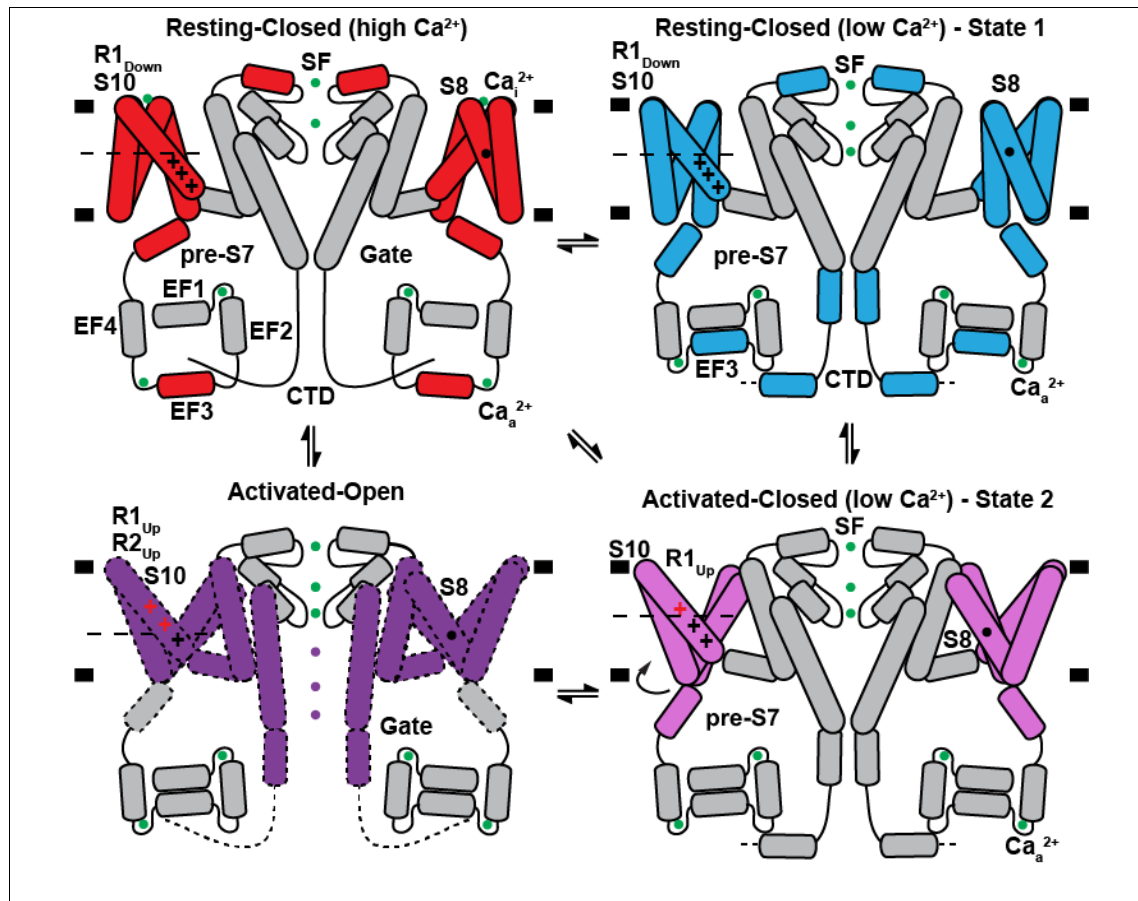

**Figure 6. Mechanism of TPC1 Channel Activation.** Schematic summarizing the conformations of VSD2, EF3, CTD, and selectivity filter (SF) observed in crystal and cryo-EM structures under high and low effective luminal  $Ca^{2+}$ -ion concentrations. A potential model for coupling between luminal inhibition  $Ca_i^{2+}$ , cytoplasmic activation  $Ca_a^{2+}$ , voltage-sensing, and channel gating is shown. Helices and ions that move between the AtTPC1<sub>WT</sub> resting-state (red), AtTPC1<sub>DDE</sub> state 1 (cyan), AtTPC1<sub>DDE</sub> state 2 (pink), and hypothetical activated-open state (purple) are colored.  $Ca^{2+}$ -ions are shown as green balls. Gating charges that change position with respect to the CT (dashed line) between states are colored red.

528

529

530

531

532

533

534

## 535 **Methods**

### 536 **Protein Production**

537 **AtTPC1.** X-ray and cryo-EM trials used AtTPC1 with deletion of residues 2-11(19). Antibody  
538 generation employed full-length AtTPC1. AtTPC1 constructs were expressed and purified by  
539 nickel affinity chromatography (NiNTA), thrombin cleavage, and size exclusion, as described  
540 previously(19). For reconstitution into saposin A lipoprotein nanoparticles and MSP nanodiscs,  
541 the size exclusion step was omitted after NiNTA, but performed after reconstitution. To  
542 introduce single cysteine labels for CW-EPR, a cysteine-less variant of AtTPC1, AtTPC1<sub>cysless</sub>,  
543 was constructed to replace all native cysteines with serines (C93S, C101S, C159S, C347S,  
544 C392S, C574S, C577S, C580S, C687S, C728S). Cysteine substitutions for EPR spectroscopy  
545 were purified in the presence of 1mM TCEP during solubilization and binding to Nickel beads,  
546 but then removed during wash and elution steps to prevent interference with MTSL-labeling.  
547 AtTPC1<sub>cysless</sub> has identical biochemical behavior to wild-type AtTPC1.

548 **Saposin A.** Human saposin A (plasmid was a kind gift from J. Frauenfeld and P. Nordlund) was  
549 expressed and purified from *E. coli* Rosetta-gami 2(DE3) cells essentially as described(30).  
550 Several colonies from transformed cells were used to inoculate overnight 300 mL LB cultures  
551 containing 25 µg/mL chloramphenicol, 10 µg/mL tetracycline, and 15 µg/mL kanamycin at 37  
552 °C. Overnight cultures were used to seed 6 L of Terrific Broth, grown to an absorbance value at  
553 600 nm of 1. The temperature was adjusted to 20 °C 30 minutes prior to induction by 0.7 mM  
554 IPTG for 15 hours at 20 °C. Cells were harvested by centrifugation at 4,000x g for 10 minutes  
555 and resuspended in 200 mL 50 mM tris pH 7.4, 150 mM NaCl (Lysis Buffer) and frozen at -80  
556 °C before further use. Bacterial pellets were lysed in the presence of 1 mM phenylmethylsulfonyl

557 fluoride (PMSF) by sonication for 5 minutes, then clarified by centrifugation at 26,000x g for 20  
558 minutes. The supernatant was then incubated at 70 °C for 10 minutes followed by centrifugation  
559 at 26,000x g for 20 minutes to remove contaminant proteins. Imidazole pH 7.4 was then added to  
560 20 mM and passed through two HisTrap FF crude 5mL columns equilibrated in Lysis Buffer  
561 with 20 mM Imidazole pH 7.4 using a peristaltic pump. Following 50 mL washes with Lysis  
562 Buffer with 20 mM Imidazole pH 7.4 and Lysis Buffer with 35 mM Imidazole pH 7.4, pure  
563 human saposin A was eluted in 25 mL Lysis Buffer with 400 mM Imidazole pH 7.4 in 1.5 mL  
564 fractions. Fractions containing human saposin A were dialyzed against 1 L of Lysis Buffer with  
565 4 mg of Tobacco Etch Virus (TEV) protease. The following morning an additional 2 mg of TEV  
566 was added with an exchange of the dialysis buffer and dialyzed at room temperature for 3 hours.  
567 Uncleaved saposin A and free TEV were removed by passing the protein through a single  
568 HisTrap FF crude 5 mL column equilibrated in Lysis Buffer with 20 mM Imidazole pH 7.4 and  
569 washed with 30 mL of Lysis Buffer with 20 mM Imidazole pH 7.4. The flow-through and wash  
570 fractions were pooled and concentrated in 5 kDa molecular weight cutoff concentrators and  
571 serially injected in 20 mg aliquots over TSKgel G3000SW 7 mm x 60 cm or Superdex S200  
572 10/300 columns equilibrated in Lysis Buffer with 1 mM CaCl<sub>2</sub>. High and low molecular weight  
573 peaks were observed during size exclusion. The low molecular weight, most consistent with the  
574 size of the saposin A monomers and dimers, was concentrated to 2 mg/mL for use in  
575 reconstitution of AtTPC1 and frozen at -80 °C. Final yields of human saposin A were 5-10  
576 milligrams of human saposin A per liter of culture.

577 **Membrane scaffold protein.** Plasmid harboring His-tagged E3D1 variant of membrane scaffold  
578 protein (MSP) of the nanodiscs was obtained from Addgene (#20066). MSP was expressed,  
579 purified and cleaved with TEV protease as described(41) with minor modifications. Colonies of

580 transformed BL21 (DE3) Gold cells (Stratagene) were used to inoculate overnight 30 mL LB  
581 cultures containing 30 µg/mL kanamycin. Overnight cultures were used to inoculate 2 L of  
582 Terrific Broth, grown at 37 °C until OD<sub>600</sub> of 1.3 and then induced with 1 mM IPTG for 3 hrs.  
583 Cultures were harvested by centrifugation at 4,000x g for 10 minutes, resuspended in 50 mM  
584 Tris pH 8.0, 300 mM NaCl (MSP Lysis Buffer) supplemented with 1% Triton X-100, protease  
585 inhibitor tablet and 1 mM PMSF. Microtip sonicator (Branson) was used to lyse the cells for 3  
586 cycles at 1s on, 1 off and at 60% amplitude for 3 minutes each. For each 1L culture 1 mL of  
587 NiNTA resin equilibrated with MSP Lysis Buffer was used in batch-binding for 1 hour at 4 °C.  
588 Resin was then washed with MSP Lysis Buffer supplemented with: 1) 1% Triton X-100 - 10  
589 column volumes (CVs), 2) 50 mM sodium cholate, 20 mM imidazole – 5 CVs, 3) 50 mM  
590 imidazole – 7 CVs. MSP was eluted with 4 CVs of MSP Lysis Buffer supplemented with 400  
591 mM imidazole. TEV cleavage was performed overnight in dialysis against 4 L of 50 mM HEPES  
592 pH 7.5 and 200 mM NaCl. Uncut protein was removed with subtractive step on NiNTA resin and  
593 cleaved MSP was concentrated to 5 mg/mL using Millipore concentrators with 10 kDa molecular  
594 weight cutoff and frozen in aliquots at -80 °C. Typical yield of MSP E3D1 from 1 L culture was  
595 15 mg.

596 **Antibodies.** Monoclonal antibodies were expressed and purified from hybridoma culture  
597 supernatants using standard methods in the Monoclonal Antibody Core Facility at OHSU (Dan  
598 Cawley). 4B8 Fab fragment was generated by papain digestion 1/20 Papain:4B8 (w/w) at 30 °C  
599 for 1 hour in the presence of 5 mM L-cysteine and quenched with 20 mM iodoacetamide. Full-  
600 length IgG and Fc regions were removed via protein A chromatography and the flow-through  
601 containing 4B8 Fab was concentrated and purified by TSK3000/Superdex200 size exclusion  
602 chromatography in 20 mM HEPES pH 7.4, 0.2M NaCl, 5% Glycerol.

603           Antibody fragments (Fabs) generated by phage display were expressed and purified  
604 essentially as described(42) from constructs subcloned into the expression vectors pRH2.2 or  
605 pSFV4 (gift from S. Sidhu). DNA was transformed into BL21-Gold(DE3) (Agilent) and used  
606 directly to set up 15 mL overnight starter cultures in 2xYT media supplemented with 50 ug/mL  
607 ampicillin. Cultures were then inoculated into 1 L of 2xYT media, grown until OD<sub>600</sub> of ~0.8-  
608 1.0, induced with 1 mM IPTG for 4 hours at 37 °C. Cells were harvested by centrifugation and  
609 disrupted in lysis buffer containing 20 mM sodium phosphate dibasic pH 7.4, 500 mM NaCl, 1  
610 mM PMSF, and 2 mM DNase, using sonicator (Branson). Lysate was heated to 55 °C for 30  
611 minutes, cleared by centrifugation and incubated with 1 mL of MabSelect ProteinA resin (GE  
612 Healthcare) in batch for 1 hour at 4 °C. Resin was washed with 15 column volumes of 20 mM  
613 sodium phosphate dibasic pH 7.4, 500 mM NaCl and then eluted with 10 ml 0.1 M acetic acid  
614 into tubes containing 1 mL of 1 M Hepes pH 7.5 to immediately neutralize elutions containing  
615 Fab fragments. Fabs were then dialyzed against 4 L of 50 mM HEPES pH 7.5 and 200 mM  
616 NaCl, concentrated with Millipore concentrators with 30 kDa molecular weight cutoff and stored  
617 in aliquots at -80 °C. Typical yield from 1 L culture varied depending on Fab fragment and was  
618 between 0.5 – 3 mg. For cryo-EM studies Fab CAT06 was modified with H12 elbow variant as  
619 described previously(43), resulting in the CAT06/H12 antibody fragment. Briefly, the H12  
620 elbow variant exchanges heavy chain residues (112)SSASTK(117) (numbering according to  
621 Kabat (44)) to (112)FNQI-K(117) with one position deleted from the sequence.

## 622 **Sapoin A and Nanodisc Reconstitution**

623 **Lipids.** All lipids were prepared from thin films. Lipids were dissolved in chloroform, aliquoted  
624 into glass vials, dried under nitrogen, and stored at -20 °C dry. Unless otherwise noted,



625 resuspending lipids was accomplished by adding buffer with or without detergent and sonicating  
626 10-30 minutes until clear.

627 **Sapoin A nanoparticles.** Sapoin A nanoparticles containing AtTPC1 were formed by mixing  
628 AtTPC1 alone or AtTPC1-Cat06/H12 Fab complexes with soy polar lipids and sapoin A in a  
629 1:8:5-10 ratio by mass. A typical preparation consisted of 2.4 mg (8 mg/mL) of NiNTA purified  
630 AtTPC1 incubated with 2.4 mg (9 mg/mL) of protein A purified CAT06/H12 (adjusted to 0.05%  
631 DDM, 1 mM CaCl<sub>2</sub>), incubated at room temperature for 5-10 minutes. AtTPC1-Cat06/H12 Fab  
632 complexes were then mixed with 4.8 mL of 5 mg/mL soy polar lipids (diluted from a 25 mg/mL  
633 stock in 1% DDM) dissolved in Size Exclusion Buffer (20 mM Hepes pH 7.3, 0.2 M NaCl, 5%  
634 Glycerol, 1 mM CaCl<sub>2</sub>, 0.05% DDM) and incubated at room temperature for 30 minutes. Then  
635 9.6 mL (2 mg/mL) sapoin A was added, incubated 1 hour at room temperature, then diluted to  
636 40 mL with Size Exclusion Buffer. Detergent was removed by adding 1 g of activated, washed,  
637 Bio-Beads SM2 (BIO-RAD) resin overnight at 4°C. Bio-Beads were activated by incubation in  
638 methanol and successively washed with copious amounts of water. The following morning,  
639 beads were removed by filtration through 5 µm syringe filter. 0.5 molar equivalent of Fab  
640 CAT06/H12 was added, incubated 30 minutes at 4 °C, then concentrated to ~0.3 mL in a 100  
641 kDa MWCO concentrator, and filtered prior to injection on a TSK4000 or Superose 6 column  
642 equilibrated in Nanodisc Size Exclusion Buffer (20 mM Hepes pH 7.3, 0.2 M NaCl, 1 mM  
643 CaCl<sub>2</sub>). A single fraction was selected for cryo-EM analysis by screening for homogeneous  
644 particles by negative-stain EM (Figure S6b-d). Cryo-EM grids were frozen following  
645 ultracentrifugation at 100,000x g (TLA-55) for 5 minutes at 4 °C without further concentration.  
646 AtTPC1-CAT06/H12-sapoin A complexes typically eluted from size exclusion at 0.5-1 mg/mL.  
647 16 lipids are observed bound to AtTPC1<sub>DDE</sub> (Figure S7).

648 **MSP nanodiscs.** Reconstitution of AtTPC1 into E3D1 nanodiscs was performed using standard  
649 protocols(45). For the purpose of antibody generation by phage display, full-length AtTPC1<sub>WT</sub>  
650 was reconstituted into nanodiscs using biotinylated version of MSP E3D1, and size exclusion  
651 fractions corresponding to AtTPC1 in biotinylated nanodiscs were used without the removal of  
652 empty nanodiscs. Final mixed lipid-detergent micelles used in reconstitution contained 10 mM  
653 soy polar extract, 1 mM CHS, and 30 mM DDM. Nanodisc assembly mix was prepared using  
654 purified TPC1, mixed micelles and MSP at 2:10:1000 ratio. All components were mixed together  
655 in Nanodisc Size Exclusion Buffer and incubated on ice for 1 hour. Next, 400-500 mg activated  
656 Bio-Beads were added per each ml of assembly mix, and the reconstitution reaction was left  
657 shaking overnight at 4°C. As a control, empty nanodiscs were prepared using the same  
658 phospholipids. All nanodisc samples for phage display experiments were concentrated,  
659 supplemented with 5% w/v sucrose, aliquoted, flash-frozen in liquid nitrogen, and kept at -80°C.

660 **Proteoliposomes.** Proteoliposomes of full-length wild-type AtTPC1 were formed by  
661 resuspending 20mg of soy polar lipids dried from chloroform resuspended in 4 mL Nanodisc  
662 Size Exclusion Buffer, subjected to 10x alternating liquid Nitrogen and warm water bath freeze-  
663 thaw cycles, then sonicated for 10 min. The opaque mixture was then passed through an Avestin  
664 hand extruder with a 400 nm pore size 10x until mildly translucent. Vesicles were disrupted by  
665 addition of 69.8 µL 10% DDM added (4 mM final), 12.1 µL 2% CHS in 10% DDM added (0.1  
666 mM final), and 1 mM CaCl<sub>2</sub>, and stirred 30 minutes at room temperature. 2 mg of AtTPC1 was  
667 added to disrupted liposomes (1:10 protein:lipid ratio) and stirred for 1 hour at room temperature  
668 using a magnetic “flea” stir bar. To form proteoliposomes, methanol washed Bio-Beads were  
669 added in increments of 300 mg, 300 mg, 500 mg, and 1 g in 1-hour intervals at room  
670 temperature. The last incubation was done at 4 °C overnight. The following morning the samples

671 were centrifuged at 100,000x g for 1 hour in a table-top ultracentrifuge (TLA-55). The  
672 proteoliposome pellet was resuspended in in 0.4 mL of Nanodisc Size Exclusion Buffer. The  
673 concentration was estimated by gel and frozen in liquid Nitrogen and stored at -80 °C. Empty  
674 liposomes were made in a similar fashion by substituting AtTPC1 protein with Size Exclusion  
675 Buffer.

## 676 **Antibody Generation**

677 **Hybridoma.** Hybridoma cell lines were generated by standard methods at OHSU by Daniel  
678 Cawley. Briefly, four Balb/c mice were injected with 25 µg of AtTPC1 proteoliposomes at 0 and  
679 14 days. On day 26, serum was prepared and tested for antibody titer in ELISA. The mice with  
680 the highest titers were used to derive hybridomas. The two best responding mice were injected  
681 on day 45-55 with 10 µg Ag as a final boost. 4 days later, spleen cells are fused with P3X mouse  
682 myeloma cells. Hybridomas were assayed 12 days later in ELISA. All candidate cell lines were  
683 expanded and given a secondary ELISA screen 12-14 days later. All antigen specific antibodies  
684 were made available as culture supernates for screening. All candidate cell lines are frozen in  
685 liquid nitrogen. 14 hybridoma antibodies were identified that specifically bind to immobilized  
686 biotinylated AtTPC1 in DDM detergent by ELISA. To select for antibodies that recognize 3D  
687 structural epitopes a counter-selection against antibodies that bind linear epitopes on denatured  
688 protein in 8M Urea was performed, yielding 5 antibodies that bind only under native conditions  
689 by ELISA. Selection of high-affinity antibodies that were capable of complex formation was  
690 conducted by fluorescence size exclusion chromatography(46) (FSEC) using FITC-labeled  
691 AtTPC1 and hybridoma supernatants containing 10-50 µg/mL whole IgG. FSEC samples were  
692 prepared by mixing 1µg FITC-Labeled AtTPC1 with 0.4 mL hybridoma supernatants  
693 (supplemented with components to make Size exclusion buffer +0.03 mg/mL Soy Polar Lipids)

694 in a total volume of 490  $\mu$ L of Size exclusion buffer. Samples were incubated at 25 °C for 1 hour  
695 or 4 °C for 4-5 hours and injected on a Superose 6 column, 0.4 mL/min, equilibrated in Size  
696 exclusion buffer at 4 °C, using an autosampler and inline fluorescence detector set at  
697 excitation=495 nm and emission=518 nm. The fluorescence detector (Shimadzu RF-10AXL)  
698 was calibrated before use by injecting varying amounts of FITC-AtTPC1 (0.1 ng-1  $\mu$ g) with  
699 known labelling efficiency.

700 **Phage Display.** To generate Fabs, the efficiency of biotinylation of AtTPC1<sub>WT</sub>-E3D1 nanodiscs  
701 was evaluated by pull-down on streptavidin-coated magnetic beads (Promega). Library sorting  
702 steps were performed using Fab Library E (DNA kindly provided by S. Koide(47)) based on  
703 previous protocols(31, 48). Six independent phage library sorting experiments were performed  
704 against biotinylated AtTPC1<sub>WT</sub>-E3D1 nanodiscs in 2 buffers containing 20 mM Hepes pH 7.3,  
705 200 mM NaCl, 5% glycerol, 1% BSA, and either 1 mM CaCl<sub>2</sub> or 1 mM EGTA. Additionally, for  
706 each CaCl<sub>2</sub> or EGTA condition, sorting was carried out in the presence of following ligands:  
707 either 1  $\mu$ M NAADP, 1  $\mu$ M trans-NED19, or no ligand control to maximize the number of  
708 multiple states of TPC1 channel during sorting (Sorting Buffer). Total of five rounds of phage  
709 library sorting were performed for each sample with decreasing concentration of immobilized  
710 biotinylated TPC1-E3D1 nanodiscs between subsequent rounds in following order 1000 nM, 600  
711 nM, 200 nM, 200 nM and 100 nM. Round 1 of sorting was performed manually using nanodisc  
712 bound to streptavidin-coated magnetic beads, and upon washing with respective Sorting Buffer,  
713 whole beads were used to infect log phase *E. coli* XL-1 strain (Stratagene) in the 2xYT media  
714 (Fisher) supplemented with 50  $\mu$ g/ml ampicillin and 10<sup>9</sup> pfu/ml of KO7 helper phage (NEB)  
715 overnight at 37 °C and 280 rpm to amplify the phage particles. The amplified phage particles  
716 after round 1 were used as an input for four additional rounds of library sorting performed semi-

717 automatically with a KingFisher magnetic bead handler (Thermo) according to described  
718 protocols(49). Starting from round 2, in every step except elution, the buffer was supplemented  
719 with 10-fold molar excess of non-biotinylated empty E3D1 nanodiscs to counter-select for MSP-  
720 , lipid-, and non-specific phage particles. Finally, in each of rounds 2-5, phage particles were  
721 eluted from magnetic beads by 15-minutes incubation with 1% Fos-Choline-12 in respective  
722 Sorting Buffer.

723 Initial validation of selection clones was performed by single point direct phage ELISA  
724 using clones from round 3, 4 and 5. Amplified phage particles at 10-fold dilution were assayed  
725 against 50 nM biotinylated nanodiscs (either empty or with AtTPC1) using HRP-conjugated anti-  
726 M13 monoclonal antibody (GE Healthcare, #27-9421-01). Assays were performed in respective  
727 Sorting Buffer supplemented with 2% BSA. Each Fab clone with  $A_{450}$  signal above 0.2 (four  
728 times the average background level of the assay) was sequenced; unique Fabs were sub-cloned  
729 into pSVF4 or pRH2.2 vectors (kind gift of S. Sidhu), and purified as described above. In total  
730 16 unique Fab sequences were obtained from total of 192 single colonies screened; 9 Fabs from  
731 library sorting with  $\text{CaCl}_2$  and 7 Fabs from library sorting with EGTA.

### 732 **Cryo-EM Structure Determination**

733 **Sample Preparation.** Samples were analyzed by negative-stain EM to determine suitability for  
734 cryo-EM. To prepare grids, 3  $\mu\text{l}$  of sample at 10–50  $\mu\text{g ml}^{-1}$  was applied to a glow discharged  
735 continuous carbon grid, which was then treated with 0.75% (w/v) uranyl formate. Grids were  
736 imaged on an FEI Tecnai T12 microscope operated at 120kV at a nominal magnification of  
737 52,000 $\times$  using an UltraScan 4000 camera (Gatan) or an FEI Tecnai T20 microscope operated at  
738 200kV and at a nominal magnification of 80,000 $\times$  using a TemCam-F816 8k  $\times$  8k CMOS

739 camera (TVIPS) camera, corresponding to pixel sizes of 2.21 Å and 0.95 Å, respectively, on the  
740 specimen.

741       Grids for cryo-EM were prepared with FEI Mark IV vitrobot. Quantafoil R1.2/1.3 400  
742 mesh holey carbon grids (EMS) were glow-discharged for 30 s. Then 2.5 µl protein sample  
743 at a concentration of 0.6-1.5 mg ml<sup>-1</sup> was applied onto the carbon face of the grids. The grids  
744 were blotted with Whatman#1 filter paper for 2-4 s at 100% humidity and plunge  
745 frozen in liquid ethane. The grids were loaded onto a 300kV Polara (FEI) with a K2 Summit  
746 direct electron detector (Gatan). Data were collected at nominal magnification of 31,000×,  
747 corresponding to a physical pixel size of 1.2156 Å (0.6078 Å super resolution pixel size) on the  
748 specimen with a dose rate of 7.6 electrons per physical pixel per second. Images were recorded  
749 with SerialEM in super-resolution counting mode and a defocus range of -0.8 to -2.0 µm. A  
750 total exposure of 12 s was used, with 0.2 s subframes (60 total frames) to give a total dose  
751 of 60 electrons per Å<sup>2</sup> (1.35 electrons per Å<sup>2</sup> per subframe). Data for AtTPC1<sub>WT</sub> in saposin A  
752 was also collected at the Janelia Cryo-EM facility FEI Titan Krios microscope operated at 300kV  
753 with a K2 camera with a physical pixel size of 1.02 Å.

754 **Image Processing.** For negative-stain data, GCTF(50), Gautomatch (Kai Zhang, url:  
755 <https://www.mrc-lmb.cam.ac.uk/kzhang/>), and RELION-2(51) were used for CTF estimation,  
756 particle picking, and 2D classification, respectively. For cryo-EM data, dose-fractionated super-  
757 resolution image stacks were drift corrected and binned 2×2 by Fourier cropping using  
758 MotionCor2(52) (after discarding the first frame). CTF determination and particle picking was  
759 performed on motion-corrected sums without dose-weighting using GCTF and Gautomatch. To  
760 generate particle picking templates and initial models a Gaussian reference was used to pick  
761 particles and 2D classification was performed in RELION-2 followed by *ab-initio* reconstruction

762 in cryoSPARC. Particles were then picked using six 2D classes as templates. 2D classification,  
763 3D classification and refinement procedures were carried out using and RELION-2 and  
764 cryoSPARC(53) (Figure S3). After 3D classification the reconstruction was filtered to 30 Å  
765 resolution and used as an initial reference model for 3D refinement in cryoSPARC v2 using the  
766 beta version of non-uniform refinement yielding a reconstruction with a gold-standard Fourier  
767 shell correlation of 3.5 Å with a 0.143 cutoff criterion. The map from cryoSPARC was used for  
768 modeling the Fab variable domain. The final 3.3 Å high-resolution reconstruction was performed  
769 in RELION-2 using 3D auto-refinement by masking out the saposin A membrane belt and the  
770 Fab using a mask created from a 30 Å low-pass filtered model of AtTPC1<sub>WT</sub>. Local resolution  
771 estimates were performed using RELION-2. The final maps were sharpened in RELION-2 using  
772 a B-factor of -104 and -117 Å<sup>2</sup> for the TPC1-Fab-saposin and TPC1-only reconstructions,  
773 respectively.

774 State 1 and 2 were identified by focused classification of VSD2 without image alignment  
775 using the angles determined from the high-resolution reconstruction (Figure S3). Focused  
776 classification benefitted from applying C2 symmetry. After 3D classification each particle set  
777 was refined in RELION-2 with global angular searches using a 30Å low pass filtered  
778 reconstruction of the combined dataset. The maps for state 1 and 2 extend to 3.7 Å as determined  
779 by the gold-standard FSC. These maps were used to build atomic models for VSD2 with local  
780 resolution in this region ranging from 4-6 Å as estimated by RELION-2 (Table S1). The final  
781 maps were sharpened in RELION-2 using a B-factor of -95 and -86 Å<sup>2</sup> for the state and state 2  
782 reconstructions, respectively.

783

784 **Structure Determination and Refinement.** The entire structure of AtTPC1<sub>DDE</sub> excluding VSD2  
785 was built into the highest resolution map (High-res; Table S1) manually after initial real-space  
786 flexible fitting and refinement of the AtTPC1<sub>WT</sub> structure into the map using Rosetta (54) with  
787 the electron scattering table. Manual fitting in COOT(55), followed by real-space coordinate and  
788 B-factor/atomic displacement factor refinement in PHENIX(56) were used in *de novo* building of  
789 the NTD, EF-hand, CTD, Ca<sup>2+</sup>-ions, lipid molecules (palmitic acid and phosphatidic acid), and  
790 the Fab-AtTPC1<sub>DDE</sub> interface. This map was calculated with a mask around TPC1, excluding the  
791 Fab. A structure of the Fab-complex (Fab-bound; Table S1) was determined from the same  
792 dataset by extending the mask to include the Fab variable domains (V<sub>H</sub> and V<sub>L</sub>). The Fab was  
793 built using a homologous structure of a Fab from the same library (PDB 3PGF) with the variable  
794 CDR loops deleted.

795 Building of the state 1 (State 1; Table S1) was accomplished by rigid body alignment of  
796 the AtTPC1<sub>WT</sub> structure to the cryo-EM map using CHIMERA (57) followed by flexible fitting  
797 and refinement in Rosetta, and extensive manual fitting in COOT. State 2 (State 2; Table S1) was  
798 built by first rotating VSD2 of AtTPC1<sub>WT</sub> to place S10. Movement of S7-S9 around the S10 axis  
799 was done manually in real-space. Gating charges R1-R3 were placed in favored rotamer  
800 positions using the rotamer library in COOT and PHENIX, while applying the additional  
801 restraint that R1-R3 must contact solvent, a polar side chain, or counter charge in the membrane.  
802 One position satisfied these criteria for each gating charge.

803 Model validation employed MolProbity(58) and EMRinger(59). Low resolution maps of  
804 AtTPC1<sub>WT</sub>-4B8 were interpreted by flexible fitting of the AtTPC1<sub>WT</sub> crystal structure and a  
805 homology model of 4B8 in real-space using Rosetta. Final AtTPC1<sub>DDE</sub> coordinates and maps  
806 have been deposited in the Electron Microscopy Data Bank (EMDB) under EMDB IDs (High-



807 resolution) 8957, (Fab) 8956, (State 1) 8958, and (State 2) 8960, and the Protein Data Bank  
808 (PDB) under PDB IDs 6E1M, 6E1K, 6E1N, and 6E1P.

809  
810 **Crystal Structure Determination.** AtTPC1 D376A (AtTPC1<sub>DA</sub>) crystals were obtained in the  
811 presence of CaCl<sub>2</sub>, CHS, soy polar lipids, and 1mM trans-NED19 (NED19), using HiLiDe(60) as  
812 described previously(19). Average diffraction was 4 Å, with 10% diffracting to 3.5-3.7 Å  
813 resolution, the best being 3.5 Å. Anisotropic resolution was determined using the CCP4 program  
814 Truncate(61) and the UCLA Anisotropy Server(62). Crystals were partially dehydrated by  
815 incubation with additional 15% (v/v) of polyethylene glycol 300 prior to freezing in liquid  
816 nitrogen.

817 X-ray diffraction datasets were collected at the Advanced Light Source (ALS) Beamlines  
818 8.3.1 and 5.0.2 and at Stanford Synchrotron Radiation Lightsource (SSRL) Beamline 12-2. Data  
819 were reduced using XDS(63). The best native dataset extends to overall resolution 3.5 x 6.0 x 4.5  
820 Å (ref.(62)). Phases were calculated by molecular replacement using PHASER(64) and AtTPC1  
821 wild-type (PDBID 5DQQ) as a search model. Structure interpretation was using COOT(55), with  
822 refinement in PHENIX(56). The structure of AtTPC1<sub>DA</sub> was refined to 3.5 Å resolution with  
823 final R<sub>work</sub>/R<sub>free</sub> of 31.84 % and 35.19%. A sharpening B-factor of -142.05 Å<sup>2</sup> was used for  
824 refinement, as described previously(19). Analysis by Molprobitry shows Ramachandran  
825 geometries of 93.09%, 6.25%, and 0.66% for favored, allowed, and outliers. The structure  
826 contains 11.31% rotamer outliers. For comparison of B-factors between AtTPC1<sub>WT</sub> (mean  
827 Wilson B-factor 108 Å<sup>2</sup>; PDB ID 5DQQ)(19) and AtTPC1<sub>DA</sub> (mean Wilson B-factor 109.86 Å<sup>2</sup>)  
828 structures, B-factors were first scaled by adding the difference in mean wilson B-factor (1.86 Å<sup>2</sup>)  
829 to the mean wilson B-factor of the wild-type AtTPC1 crystal structure (PDBID 5DQQ)(19). The

830 AtTPC1<sub>DA</sub> structure and structure factors have been deposited in the Protein Data Bank (PDB)  
831 under PDB ID 6CX0.

832

### 833 **EPR Spectroscopy**

834 **Sample Preparation for CW-EPR.** Concentrated (7-12 mg/mL) NiNTA-purified AtTPC1<sub>cysless</sub>  
835 mutations were incubated with 10-fold molar excess MTSL (MTSL; Toronto Research  
836 Chemicals, Inc) dissolved at 10 mg/mL in DMSO for 2 hours at room temperature. The samples  
837 were then split in half and treated with either 1mM CaCl<sub>2</sub> or 5mM EGTA pH 7.4 prior to  
838 filtration and purification by size exclusion chromatography in 1mM CaCl<sub>2</sub> or 5mM EGTA pH  
839 7.4, respectively. AtTPC1<sub>cysless</sub> has identical biochemical behavior to AtTPC1<sub>WT</sub> and maintains  
840 structural integrity as evidenced by negative-stain EM analysis. Fractions containing labeled  
841 AtTPC1<sub>cysless</sub> were pooled and concentrated to 5 mg/mL for EPR measurements.

842 **EPR Data Collection.** For continuous wave (CW) EPR experiments, X-band spectra were  
843 collected on a Varian E-102 Century series spectrometer fitted with a loop-gap resonator  
844 (Medical Advances, Milwaukee, WI). Samples (10 uL) were contained in a 0.64/0.80 mm  
845 (i.d./o.d.) quartz capillary (Vitrocom, Mountain Lakes, NJ) and spectra were recorded at room  
846 temperature over 100 G with an incident microwave power of 2 mW, modulation amplitude of 1  
847 G, and modulation frequency of 100 kHz; typical total scan times were 5 minutes. CW spectra  
848 were normalized and corrected for minute deviations in baseline prior to comparison and  
849 analysis. All data were plotted using Origin 6 after normalizing the area under integrated CW  
850 spectrum.

851 Cryo-EM structural data of AtTPC1<sub>DDE</sub> has been deposited to the Protein Data Bank under  
852 accession codes 6E1K, 6E1M, 6E1N, 6E1P and the Electron Microscopy Data Bank under

853 accession codes 8956, 8957, 8958, 8960. X-ray structural data of AtTPC1<sub>DA</sub> has been deposited  
854 to the Protein Data Bank under accession code 6CX0. Correspondence and requests for materials  
855 should be addressed to R.M.S (stroud@msg.ucsf.edu) and Y.C. (ycheng@ucsf.edu).
